# Supplementary material
Source: PubMed Central journal article supplement (PMC7512439)
Supplement: ao0c01916_si_001.pdf [file ao0c01916_si_001.pdf]

## Supplementary material

### **Synthesis and Characterization of Poly(RGD) Proteinoid Polymers and NIR fluorescent Nanoparticles of Optimal D,L-Configuration for Drug Delivery Applications – In Vitro Study**

*Elad Hadad<sup>a</sup>, Safra Rudnick-Glick<sup>a</sup>, Igor Grinberg<sup>a</sup>, Michal Kolitz-Domb<sup>a</sup>, Jordan H.Chill<sup>b</sup> and  
Shlomo Margel<sup>a\*</sup>*

<sup>a</sup>Department of Chemistry, Institute of Nanotechnology & Advanced Materials, Bar Ilan  
University, Ramat-Gan, Israel

<sup>b</sup>Department of Chemistry, Bar Ilan University, Ramat-Gan 5290002, Israel

Supporting information including:

Figure S1. FTIR spectrum and UV-Vis absorption spectra of P(R<sup>D</sup>GD<sup>D</sup>, RGD, RGD<sup>D</sup>) proteinoids.

Figure S2: 2D-NMR analysis of P(R<sup>D</sup>GD) proteinoids.

Figure S3: NMR analysis of P(R<sup>D</sup>GD<sup>D</sup>, RGD, RGD<sup>D</sup>) composition.

Figure S4: Simulations for prediction of RGD-content in P(R<sup>D</sup>GD, R<sup>D</sup>GD<sup>D</sup>, RGD, RGD<sup>D</sup>) NPs.

Table S1: NMR analysis of amino-acid incorporation into P(RGD)s.

Figure S5: Photostability of the encapsulated ICG P(R<sup>D</sup>GD R<sup>D</sup>GD<sup>D</sup>, RGD, RGD<sup>D</sup>) NPs and Free ICG

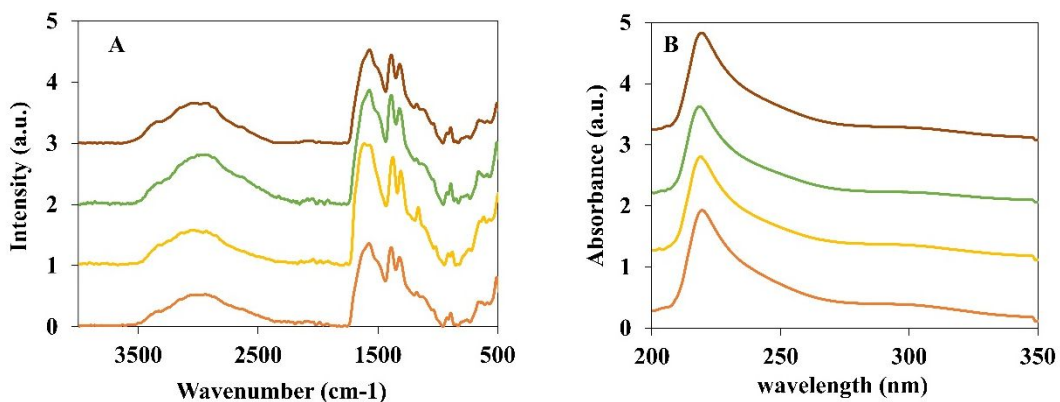

**Figure S1. FTIR spectrum (A) and UV-Vis absorption spectra (B) of, P(R<sup>D</sup>GD R<sup>D</sup>GD<sup>D</sup>), RGD, RGD<sup>D</sup>) proteinoids (orange, yellow, green, brown) respectively.**

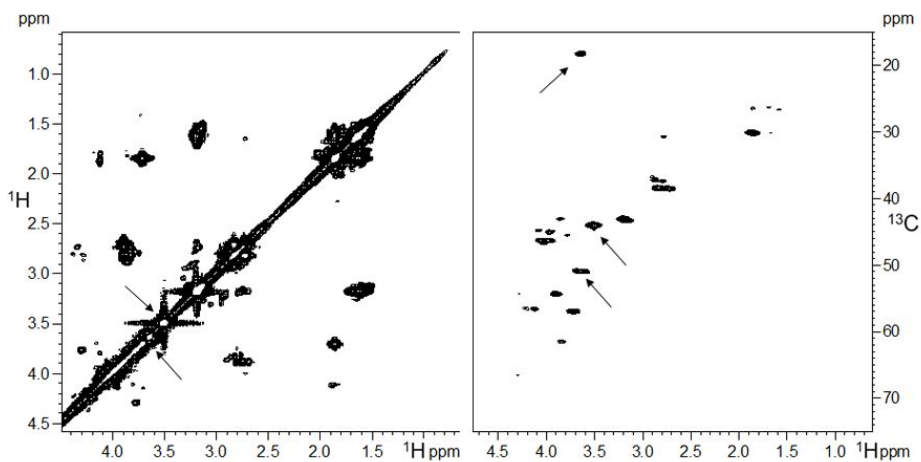

**Figure S2. 2D-NMR analysis of P(R<sup>D</sup>GD) proteinoids. Left, 2D homonuclear COSY spectrum of P(R<sup>D</sup>GD), and right, 2D <sup>1</sup>H-<sup>13</sup>C-HMQC spectrum of P(R<sup>D</sup>GD), both acquired for a 10 mg/ml sample in <sup>2</sup>H<sub>2</sub>O at 300 K and 16.4 T. Analysis of these spectra and comparison to expected correlation cross-peaks of the three amino acids allowed specific peaks (marked with arrows) to be identified as non-proteinoid signals and to be excluded from the integration analysis.**

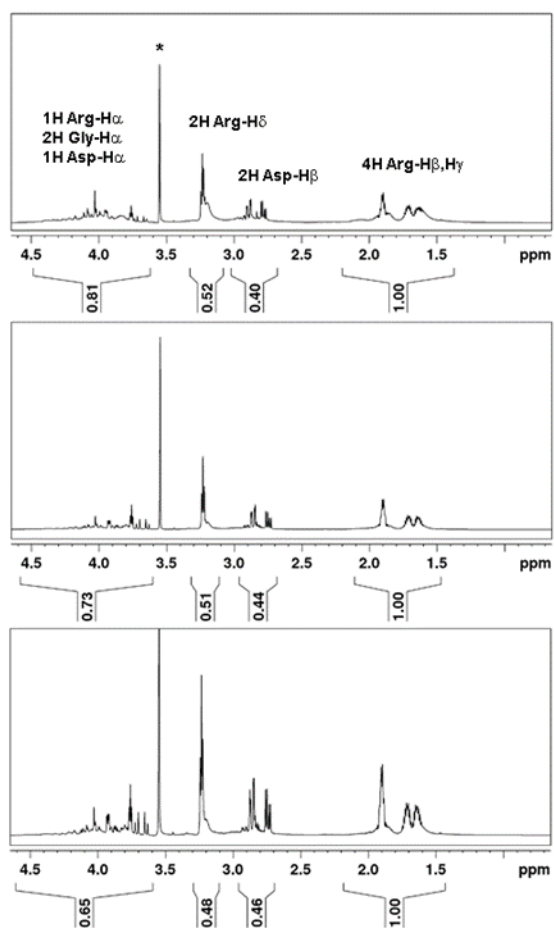

**Figure S3. NMR analysis of  $\text{P}(\text{R}^{\text{D}}\text{GD})$  proteinoid amino acid composition.** Similarly to Figure 1,  $^1\text{D } ^1\text{H-NMR}$  spectrum of 10 mg/ml proteinoid in  $^2\text{H}_2\text{O}$  were acquired at 300 K and 16.4 T. Signals emanating from arginine, glycine and aspartate protons as well as integrated signal areas are shown. Asterisks denote non-proteinoid peaks excluded from the integration analysis. **Top**,  $\text{P}(\text{R}^{\text{D}}\text{GD}^{\text{D}})$ , **Middle**,  $\text{P}(\text{R}\text{GD}^{\text{D}})$ , **Bottom**,  $\text{P}(\text{R}\text{GD})$ .

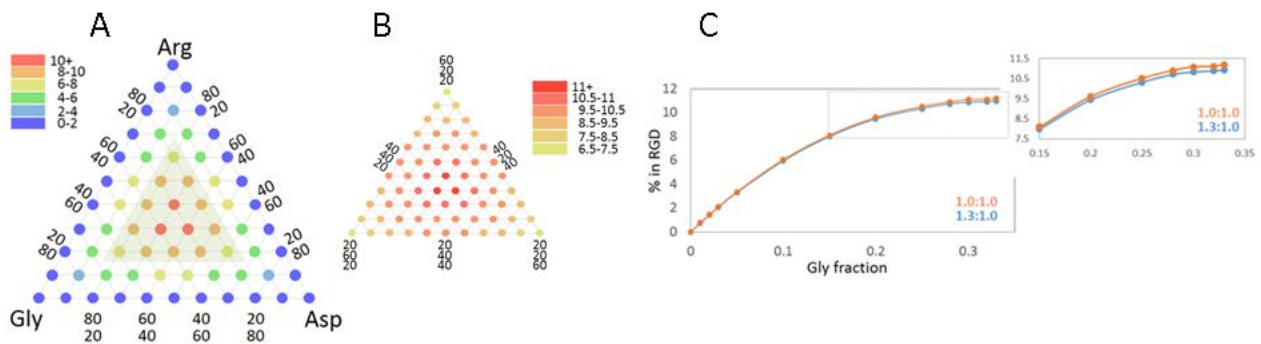

**Figure S4. Simulations for prediction of RGD content using amino acid composition.** Based on the NMR-derived amino acid composition, random polypeptides were simulated and RGD occurrences counted. These are presented in a ternary component graph. **(A)** Percentage of residues involved in RGD triads as a function of the amino acid composition. **(B)** Detailed presentation of central region (shaded grey triangle) of the graph in (A). The color scale shows the %RGD for each point in the ternary graph. **(C)** Expected levels of residue involvement in RGD triads for conditions prevalent in this study as a function of the Gly mol:mol fraction when Arg:Asp is 1:1 (blue) and when Arg:Asp is 1.3:1 (orange), representing the range of ratios seen in our P(RGD)s.

**Table S1a: NMR analysis of amino-acid composition in P(R<sup>D</sup>GD<sup>D</sup>)**

| ppm-1 | ppm-2 | <sup>1</sup> H nuclei                                                                                 | Relative intensity | Normalized intensity <sup>a</sup>                                                          |
|-------|-------|-------------------------------------------------------------------------------------------------------|--------------------|--------------------------------------------------------------------------------------------|
| 1.25  | 2.21  | 4H Arg <sup>D</sup> (H <sup>β</sup> ,H <sup>γ</sup> )                                                 | 1.00               | 0.25                                                                                       |
| 2.60  | 3.02  | 2H Asp <sup>D</sup> (H <sup>β</sup> )                                                                 | 0.40               | 0.20                                                                                       |
| 3.04  | 3.32  | 2H Arg <sup>D</sup> (H <sup>δ</sup> )                                                                 | 0.52               | 0.26                                                                                       |
| 3.56  | 4.41  | 1H Arg <sup>D</sup> (H <sup>α</sup> ), 2H Gly(H <sup>α</sup> ), 1H Asp <sup>D</sup> (H <sup>α</sup> ) | 0.81 <sup>b</sup>  | Arg <sup>D</sup> – 0.25 <sup>c</sup><br>Gly – 0.18<br>Asp <sup>D</sup> – 0.20 <sup>c</sup> |

**Table S1b: NMR analysis of amino-acid composition in P(RGD<sup>D</sup>)**

| PPM-1 | PPM-2 | <sup>1</sup> H nuclei                                                                    | Relative intensity | Normalized intensity <sup>a</sup>                                             |
|-------|-------|------------------------------------------------------------------------------------------|--------------------|-------------------------------------------------------------------------------|
| 1.25  | 2.21  | 4H Arg(H <sup>β</sup> ,H <sup>γ</sup> )                                                  | 1.00               | 0.25                                                                          |
| 2.60  | 3.02  | 2H Asp <sup>D</sup> (H <sup>β</sup> )                                                    | 0.44               | 0.22                                                                          |
| 3.04  | 3.32  | 2H Arg(H <sup>δ</sup> )                                                                  | 0.51               | 0.255                                                                         |
| 3.56  | 4.41  | 1H Arg (H <sup>α</sup> ), 2H Gly(H <sup>α</sup> ), 1H Asp <sup>D</sup> (H <sup>α</sup> ) | 0.73 <sup>b</sup>  | Arg – 0.25 <sup>c</sup><br>Gly – 0.13<br>Asp <sup>D</sup> – 0.22 <sup>c</sup> |

**Table S1c: NMR analysis of amino-acid composition in P(RGD)**

| PPM-1 | PPM-2 | <sup>1</sup> H nuclei                                                     | Relative intensity | Normalized intensity <sup>a</sup>                                 |
|-------|-------|---------------------------------------------------------------------------|--------------------|-------------------------------------------------------------------|
| 1.25  | 2.21  | 4H Arg(H <sup>β</sup> ,H <sup>γ</sup> )                                   | 1.00               | 0.25                                                              |
| 2.60  | 3.02  | 2H Asp(H <sup>β</sup> )                                                   | 0.46               | 0.23                                                              |
| 3.04  | 3.32  | 2H Arg(H <sup>δ</sup> )                                                   | 0.48               | 0.24                                                              |
| 3.56  | 4.41  | 1H Arg(H <sup>α</sup> ), 2H Gly(H <sup>α</sup> ), 1H Asp(H <sup>α</sup> ) | 0.65 <sup>b</sup>  | Arg – 0.25 <sup>c</sup><br>Gly – 0.085<br>Asp – 0.23 <sup>c</sup> |

<sup>a</sup> Signal intensity per proton nucleus.

<sup>b</sup> Excluding the signals from solvent impurities at 3.57/3.65 ppm.

<sup>c</sup> Relative contributions of Arg/Gly/Asp were based on the appropriate stoichiometric ratios.

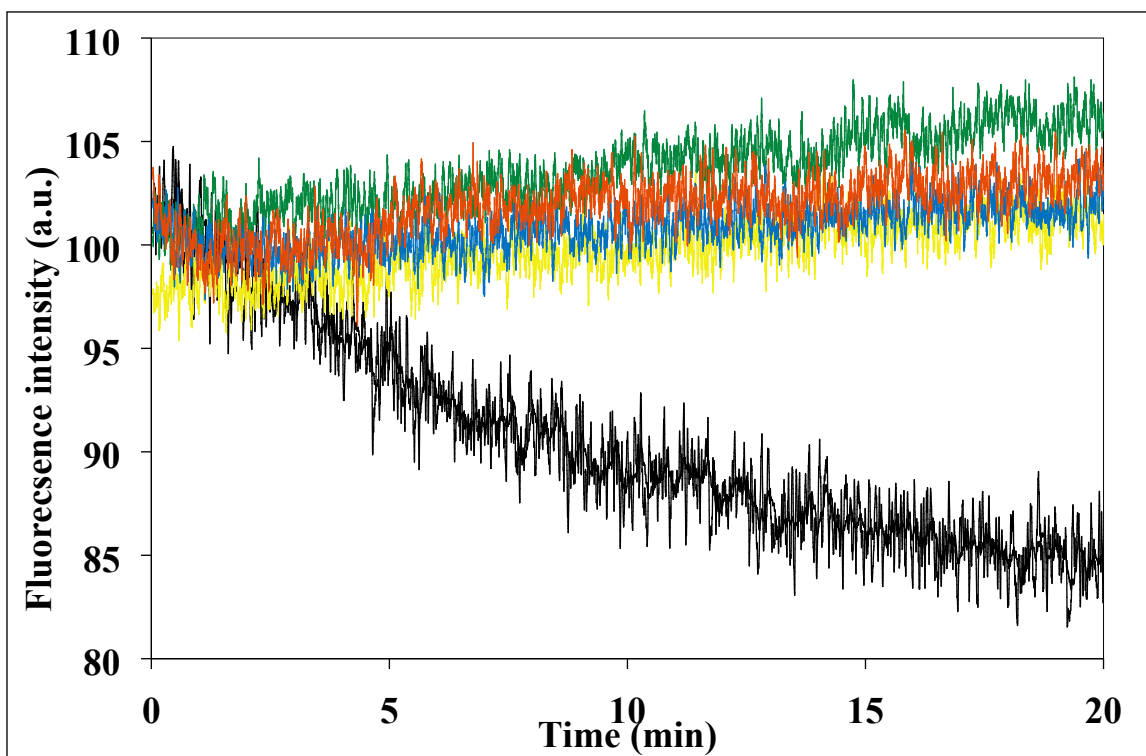

**Figure S5. Photostability of the encapsulated ICG P(R<sup>D</sup>GD R<sup>D</sup>GD<sup>D</sup>, RGD, RGD<sup>D</sup>) NPs and Free ICG.** Illumination was performed continuously at 780 nm for a period of 30 minutes, for all the four different configurations of the ICG-encapsulated P(R<sup>D</sup>GD, R<sup>D</sup>GD<sup>D</sup>, RGD, RGD<sup>D</sup>) NPs and were compared to the photostability of the free ICG. **(Red)** ICG-encapsulated P(R<sup>D</sup>GD<sup>D</sup>) NPs, **(blue)** ICG-encapsulated P(RGD) NPs, **(green)** ICG-encapsulated P(R<sup>D</sup>GD) NPs, **(yellow)** ICG-encapsulated P(RG<sup>D</sup>D) NPs, **(black)** free ICG.
